# Supplementary material
Source: PubMed Central journal article supplement (PMC11229140)

Riaz, *et al*

**a**

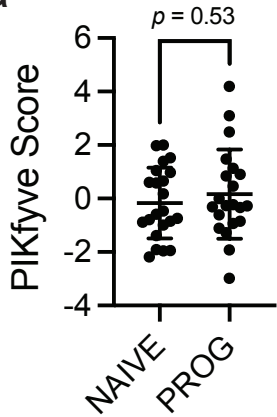

**b**

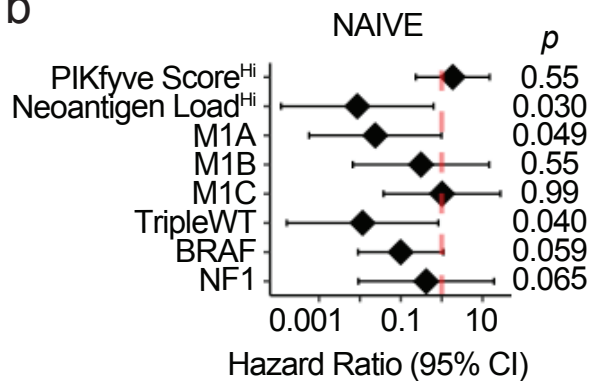

**c**

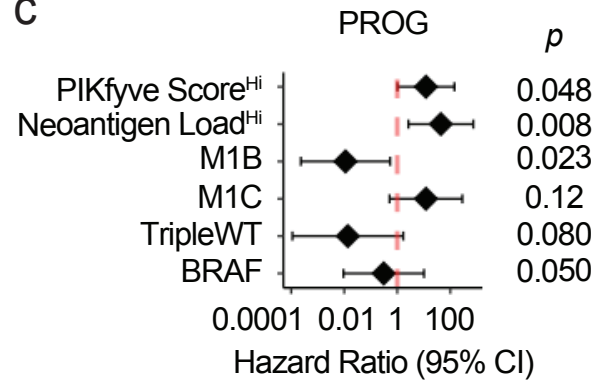

Qian, *et al*

**d**

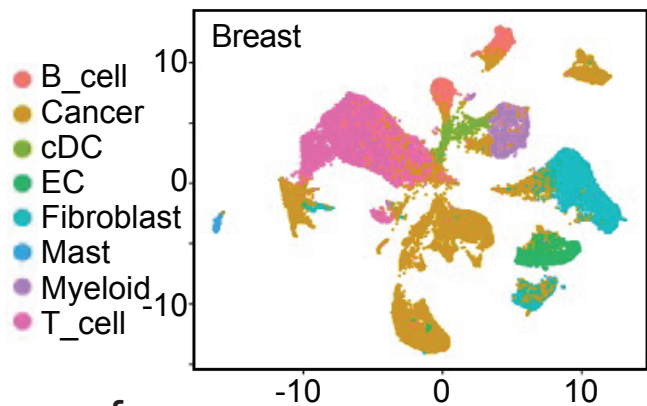

**e**

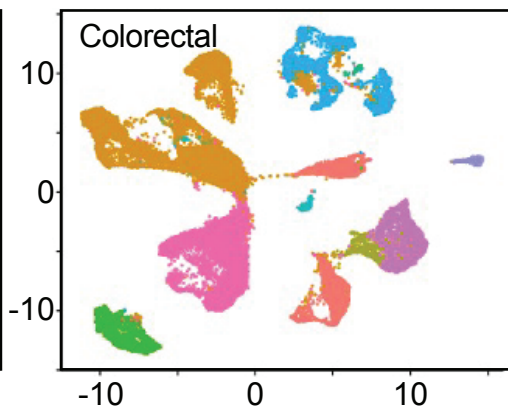

**h**

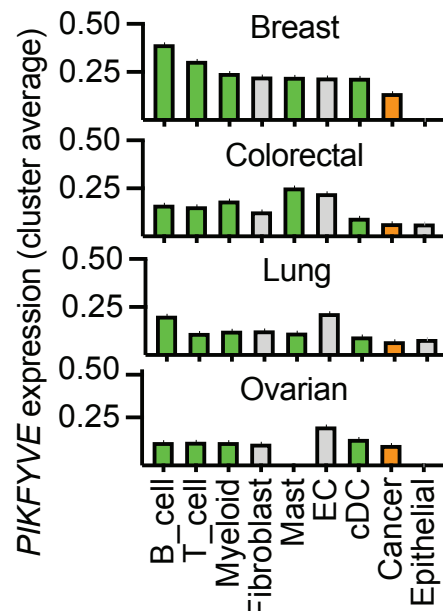

**f**

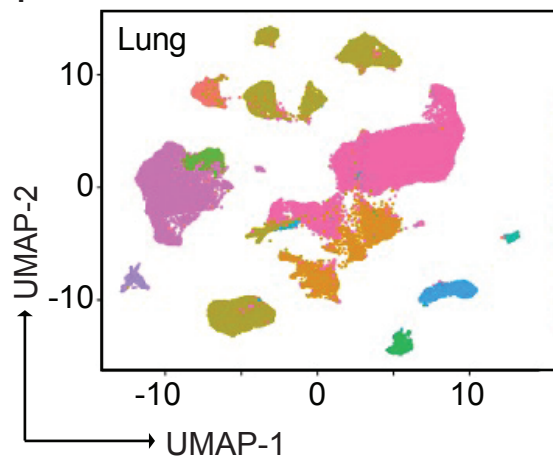

**g**

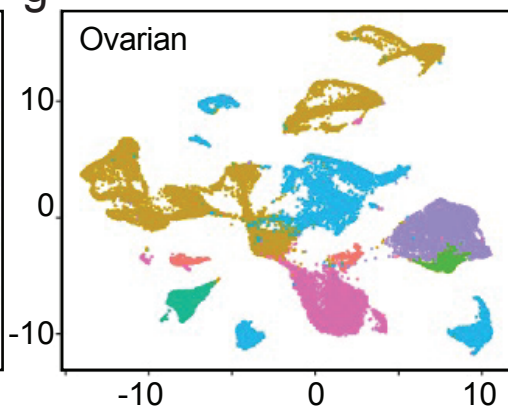

Chow, *et al*

**i**

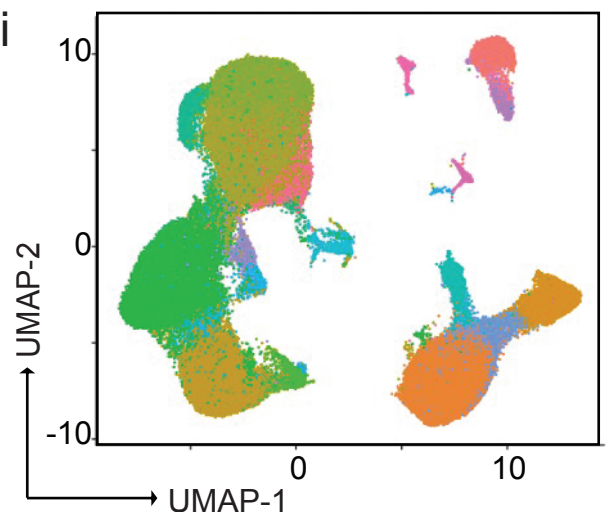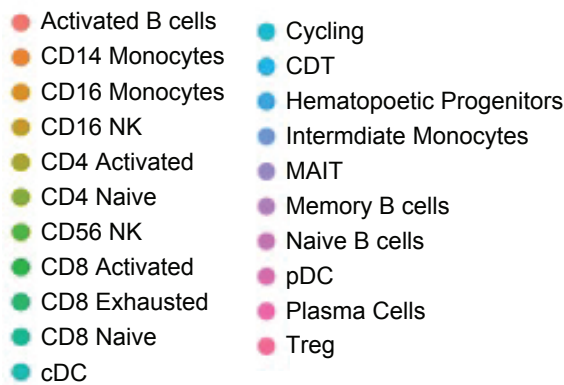

**j**

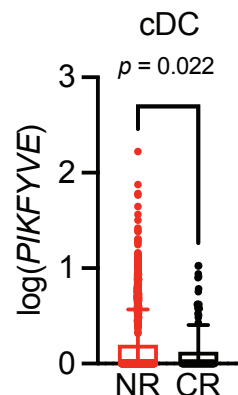

**a**

Gating strategy for Supp 2b-g

| Subset                     | Gating Strategy                                                                                                                                                     |
|----------------------------|---------------------------------------------------------------------------------------------------------------------------------------------------------------------|
| Naïve                      | CD3 <sup>+</sup> CD8 <sup>+</sup> CD44 <sup>Lo</sup> CD62L <sup>+</sup>                                                                                             |
| Terminally differentiated  | CD3 <sup>+</sup> CD8 <sup>+</sup> CD44 <sup>Hi</sup> KLRG1 <sup>+</sup>                                                                                             |
| Resident Memory            | CD3 <sup>+</sup> CD8 <sup>+</sup> CD44 <sup>Hi</sup> KLRG1 <sup>-</sup> CD49a <sup>+</sup>                                                                          |
| Exhausted                  | CD3 <sup>+</sup> CD8 <sup>+</sup> CD44 <sup>Hi</sup> KLRG1 <sup>-</sup> CD49a <sup>-</sup> TIM3 <sup>+</sup> PD-1 <sup>+</sup>                                      |
| Central memory             | CD3 <sup>+</sup> CD8 <sup>+</sup> CD44 <sup>Hi</sup> KLRG1 <sup>-</sup> CD49a <sup>-</sup> TIM3 <sup>-</sup> PD-1 <sup>-</sup> CD62L <sup>+</sup>                   |
| CD69 <sup>+</sup> Effector | CD3 <sup>+</sup> CD8 <sup>+</sup> CD44 <sup>Hi</sup> KLRG1 <sup>-</sup> CD49a <sup>-</sup> TIM3 <sup>-</sup> PD-1 <sup>-</sup> CD62L <sup>-</sup> CD69 <sup>+</sup> |
| CD69 <sup>-</sup> Effector | CD3 <sup>+</sup> CD8 <sup>+</sup> CD44 <sup>Hi</sup> KLRG1 <sup>-</sup> CD49a <sup>-</sup> TIM3 <sup>-</sup> PD-1 <sup>-</sup> CD62L <sup>-</sup> CD69 <sup>-</sup> |

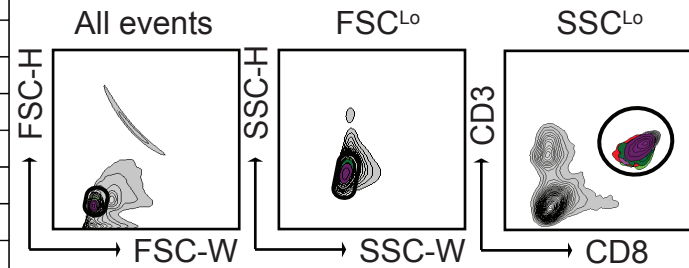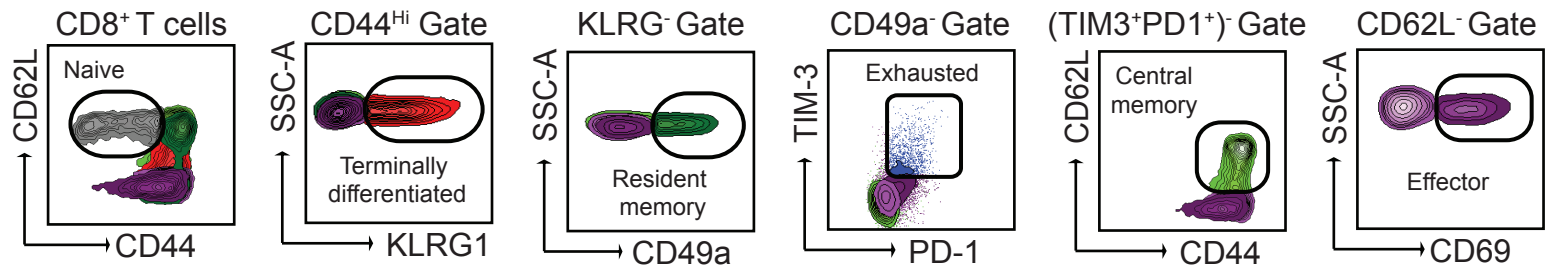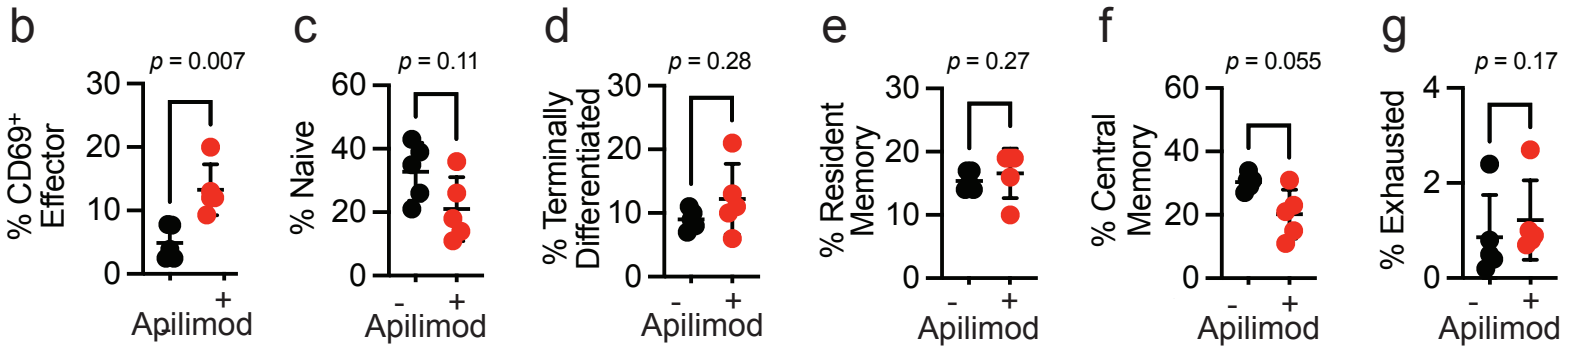

**h**

Gating strategy for Fig.2a-b, Supp 2i-l

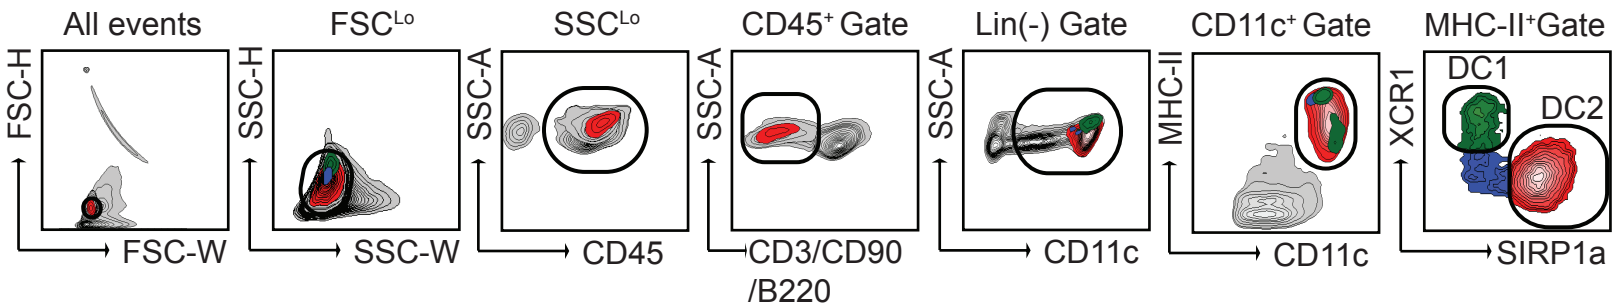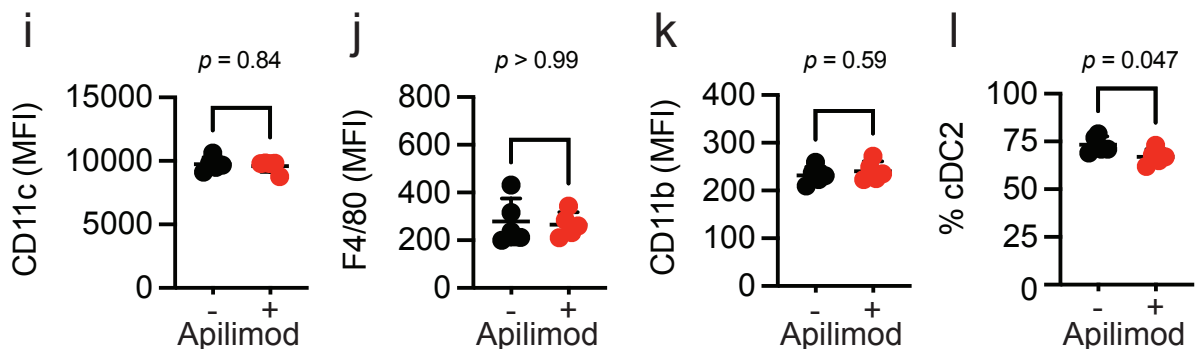

**a** Gating strategy for Fig.2c-r; Supp 3b-h (cDC)

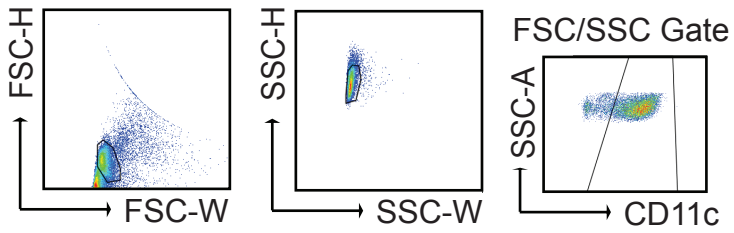

**b** ■ DMSO  
■ Apilimod

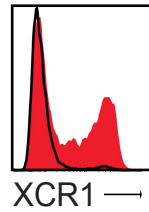

**c**

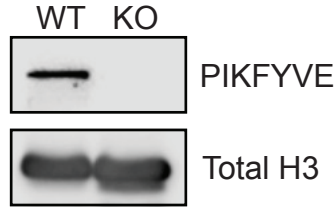

**d** ■ WT  
■ KO

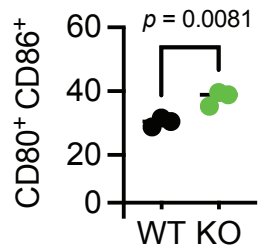

**e**

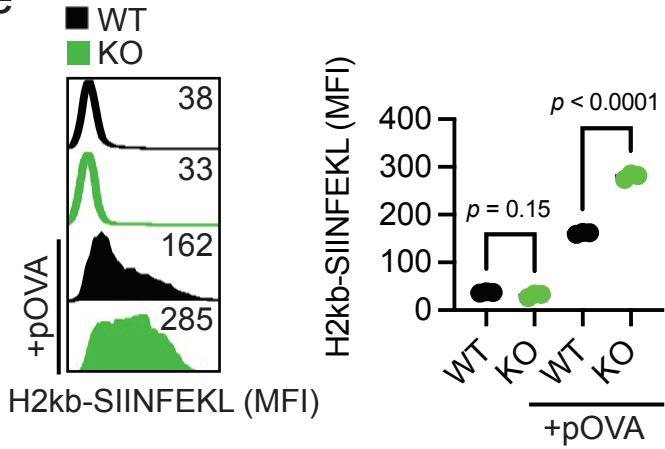

**f**

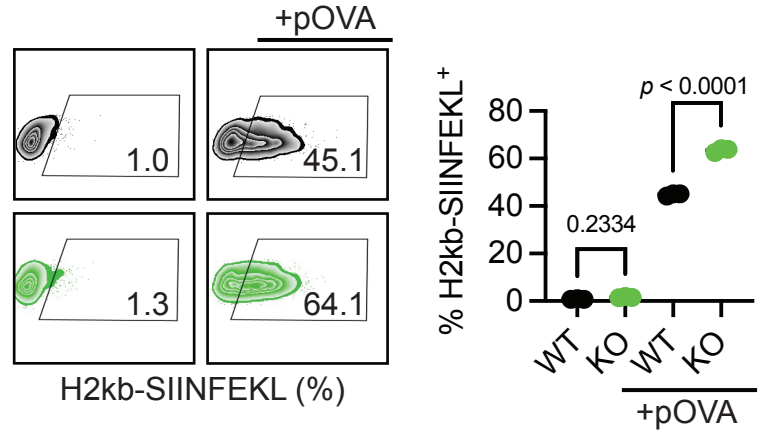

**g**

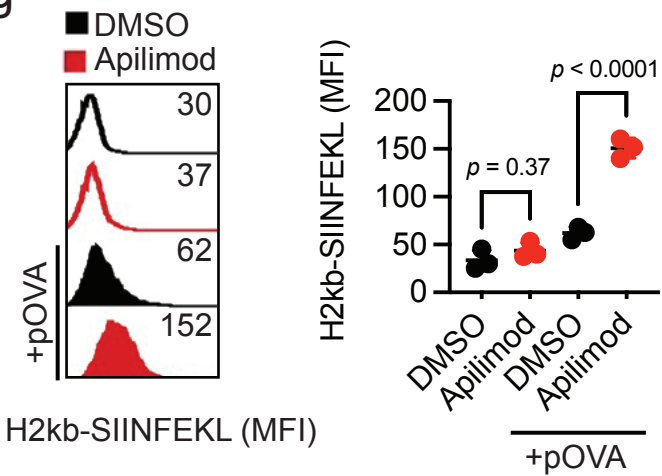

**h**

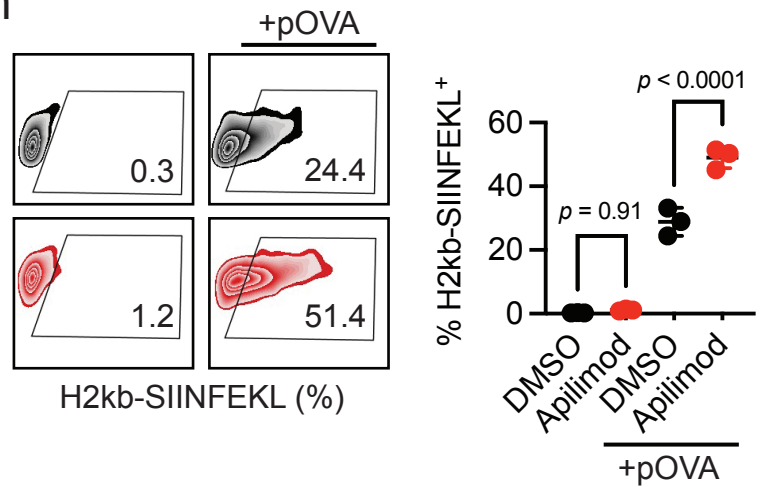

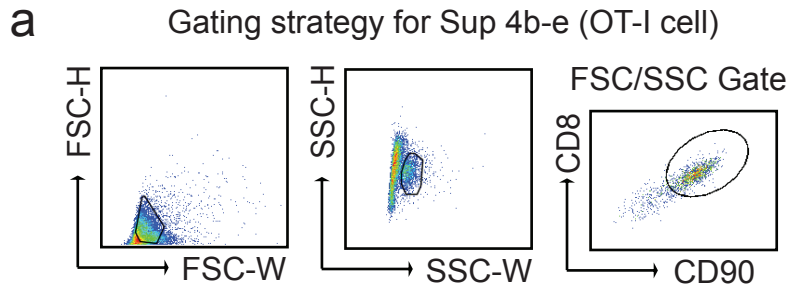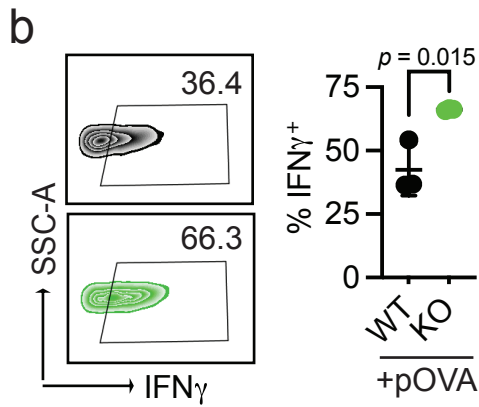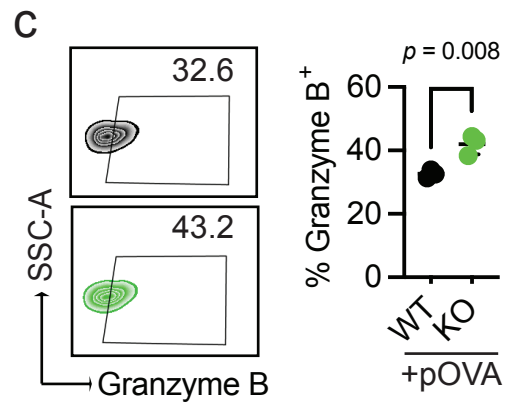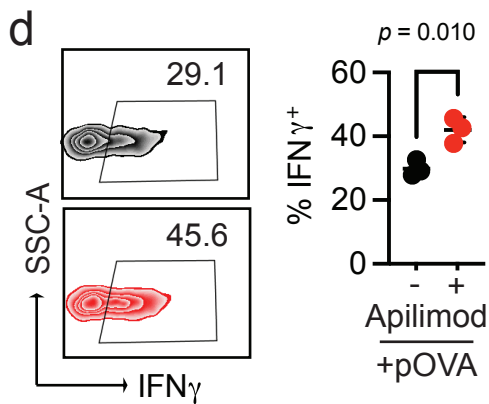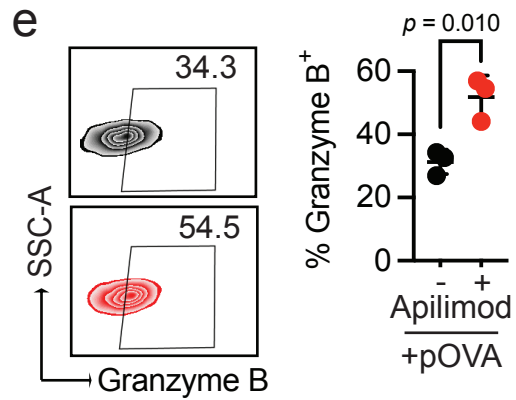

OT-I cells

OT-II cells

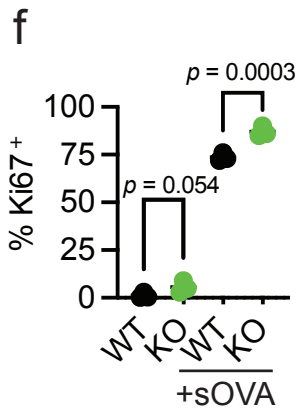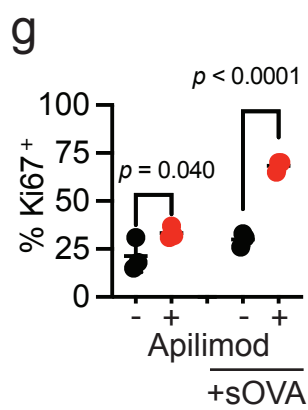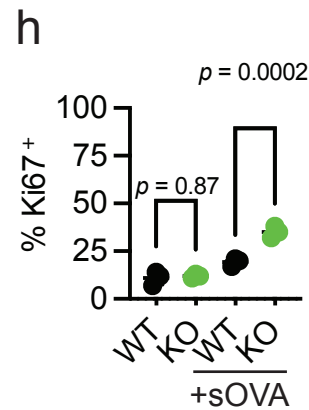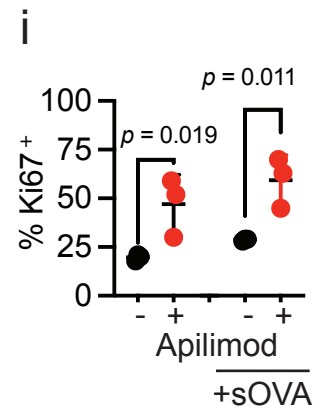

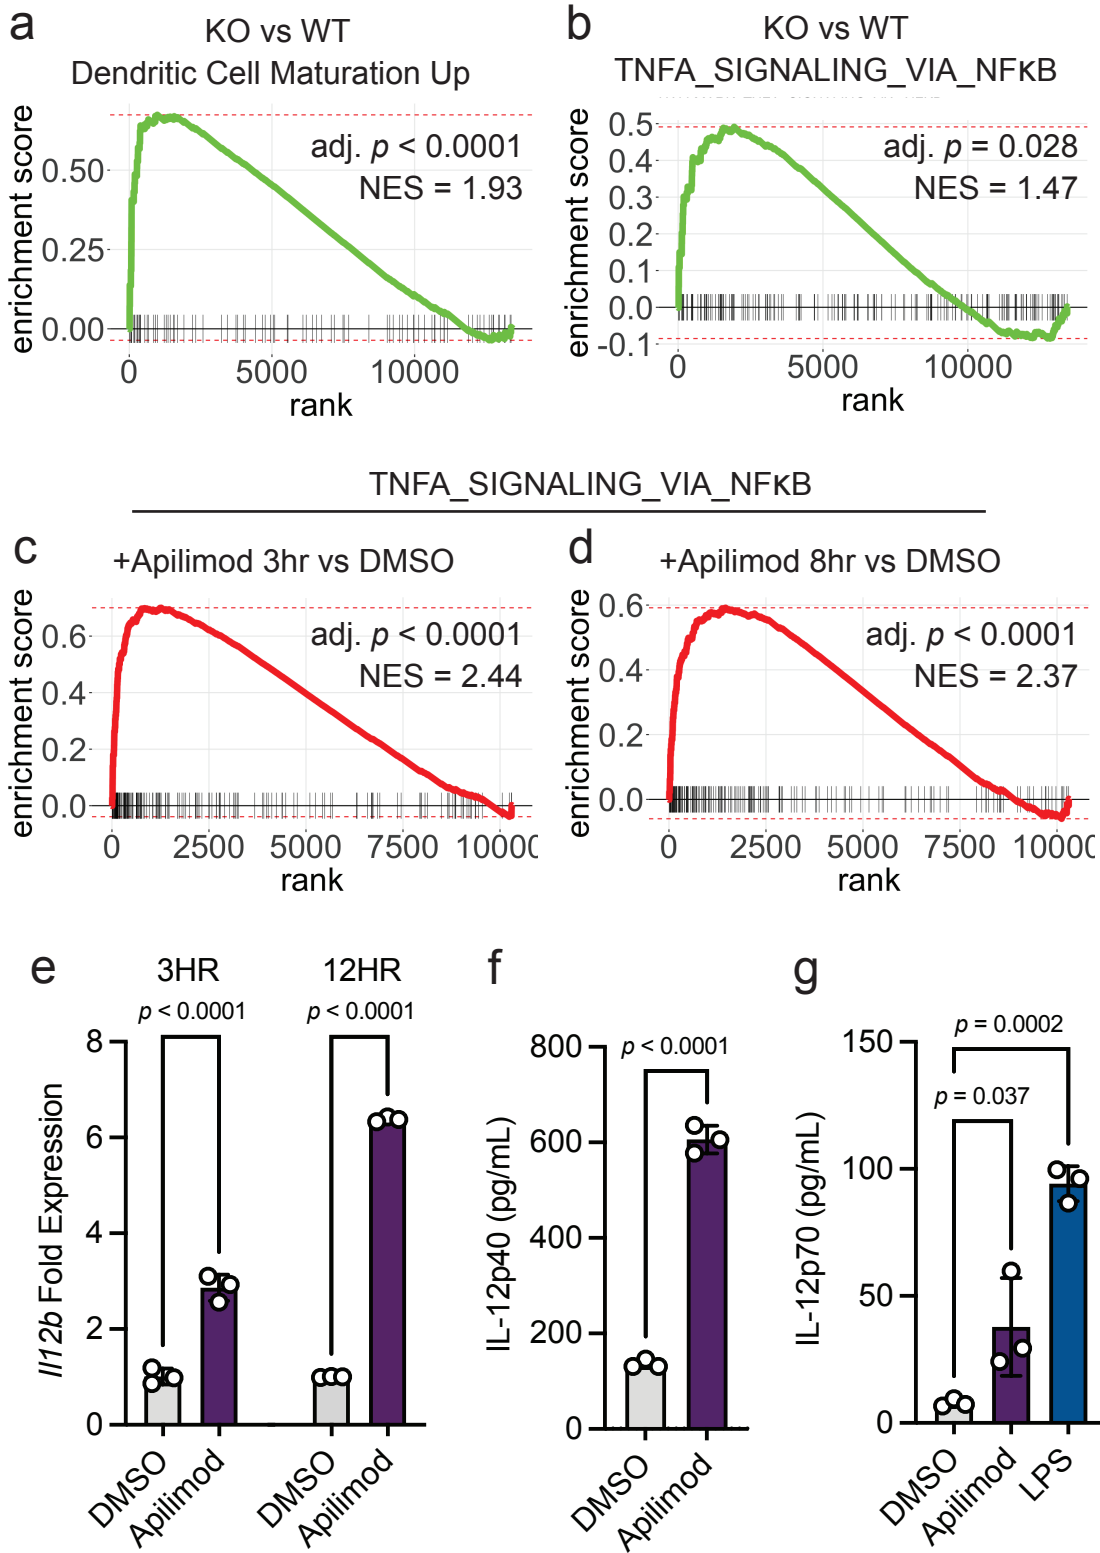

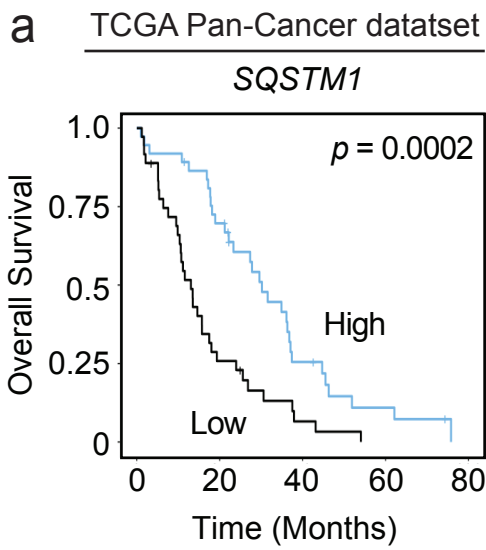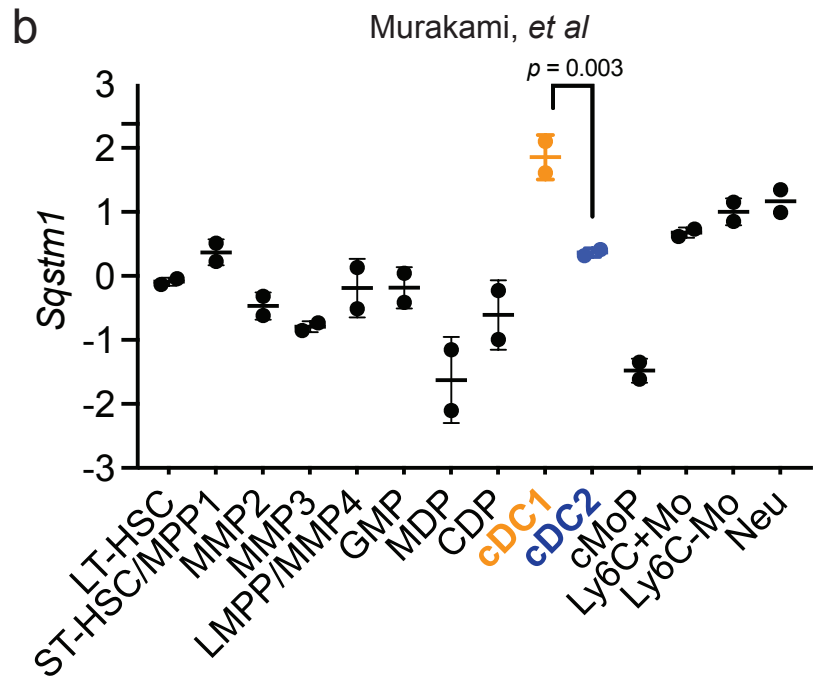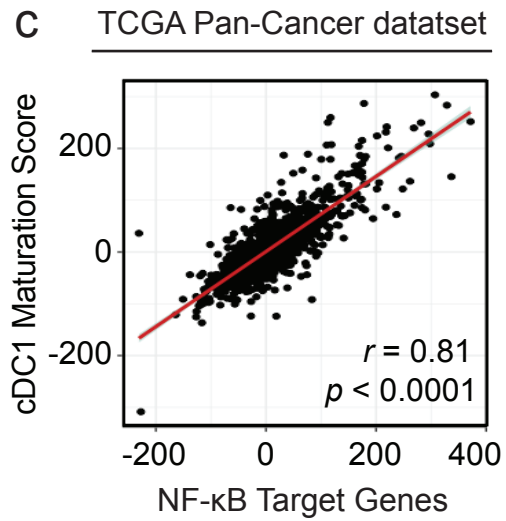

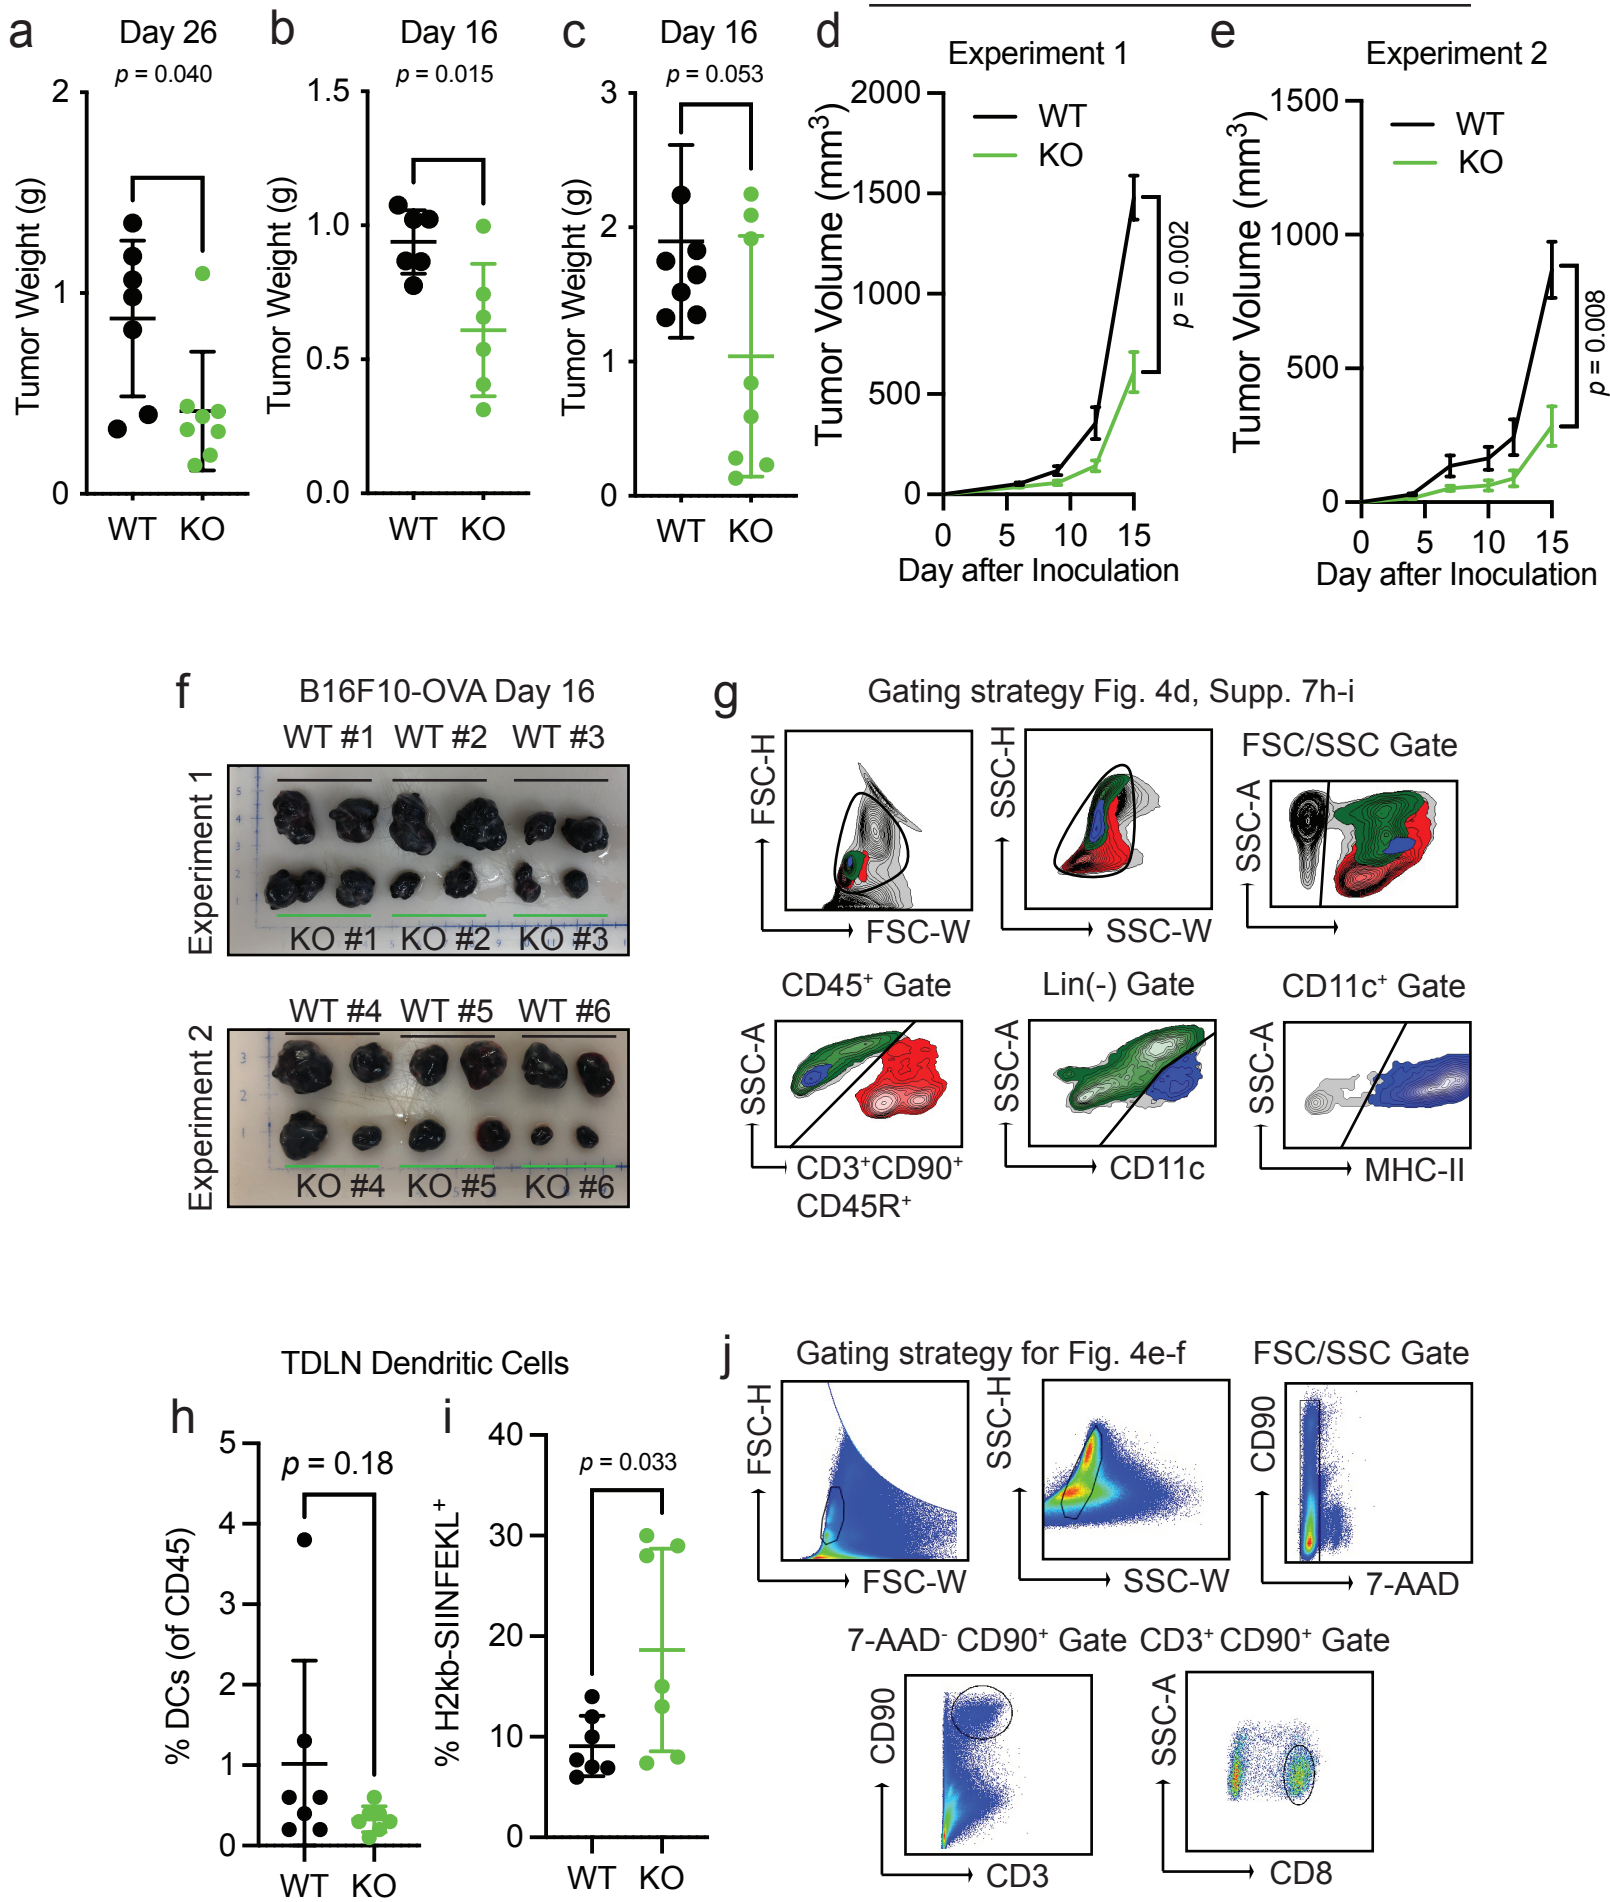

B16F10 Tumors Day 6

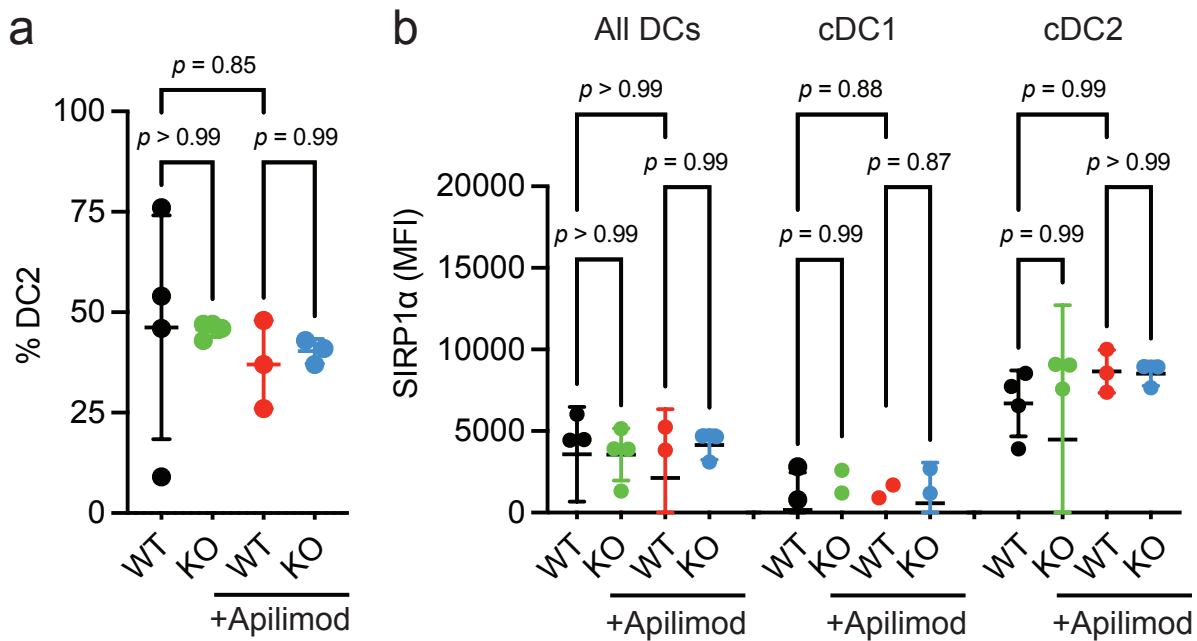



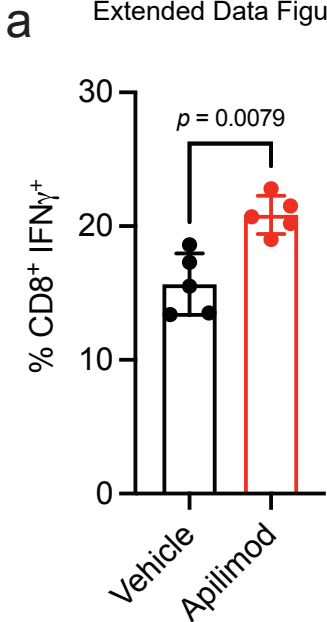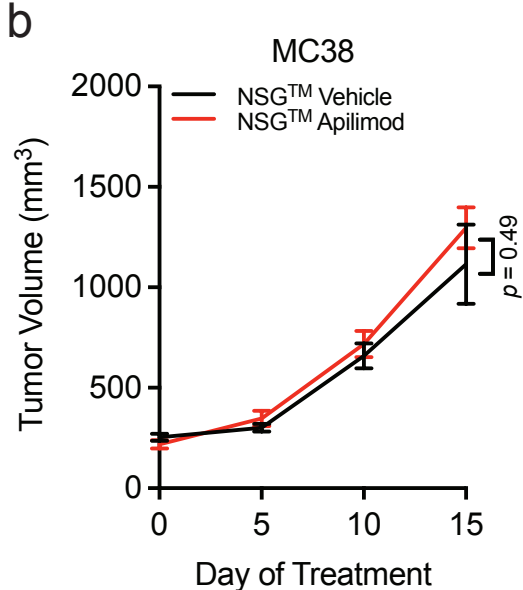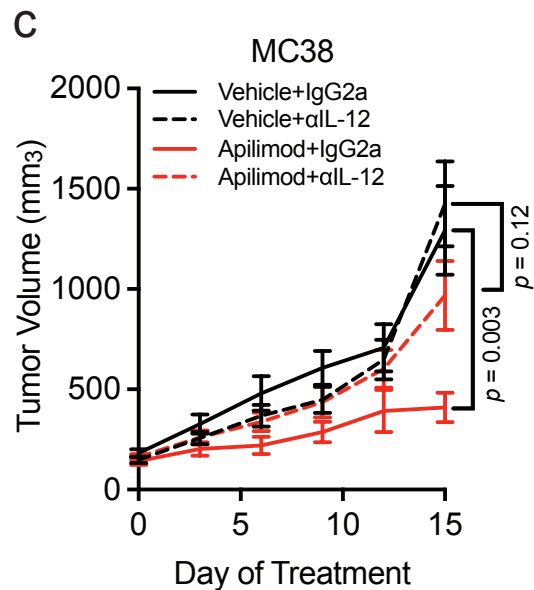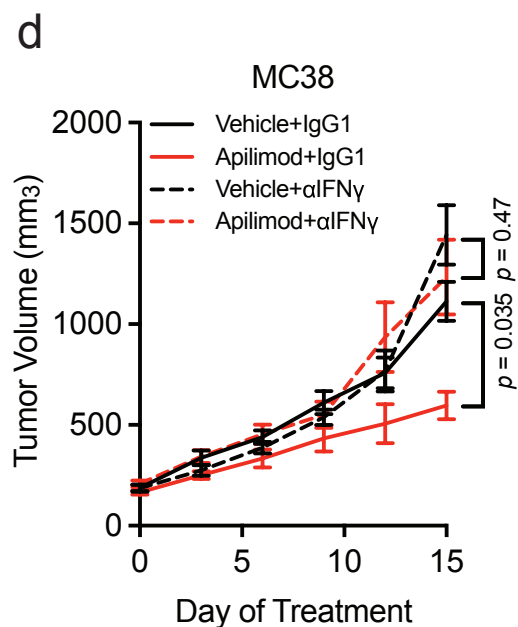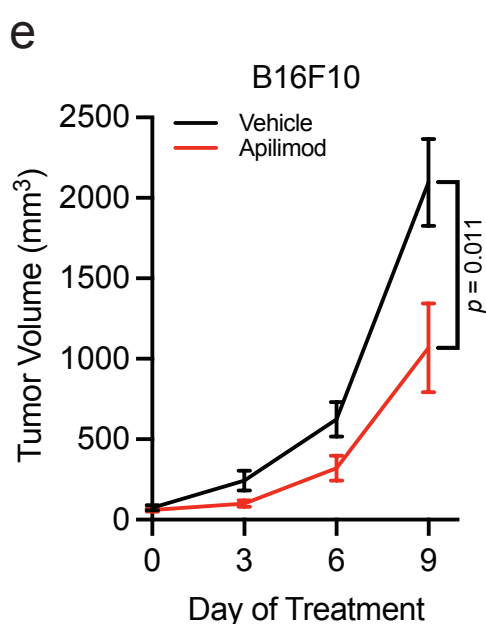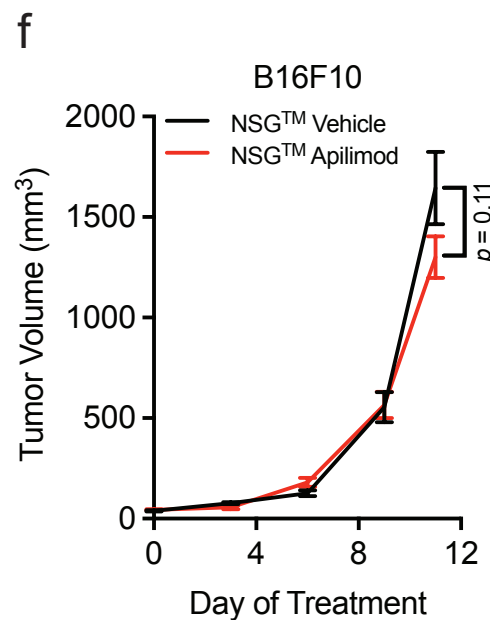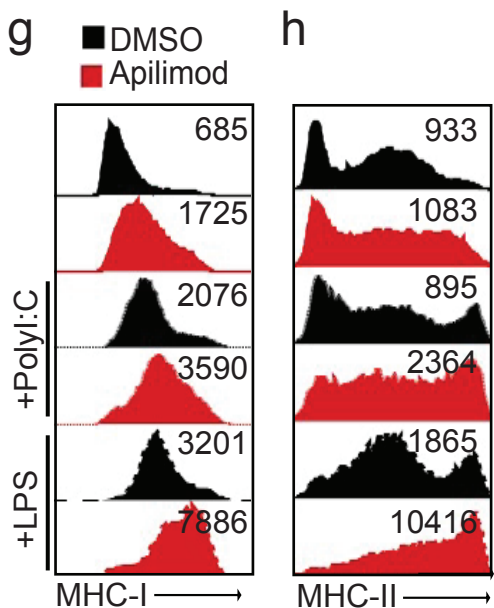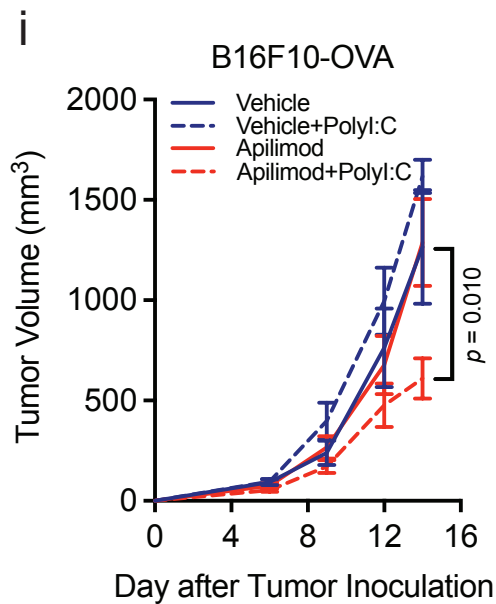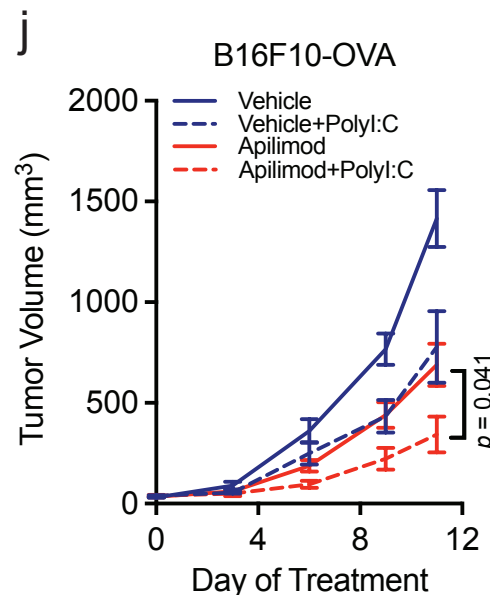

Supplement: media-1.pdf [file media-1.pdf]
